# Supplementary material for: Risk of first cervical HPV infection and pre-cancerous lesions after onset of sexual activity: analysis of women in the control arm of the randomized, controlled PATRICIA trial
Source: PubMed Central journal article supplement (PMC4251672; doi:10.1186/s12879-014-0551-y), 2014-10-30

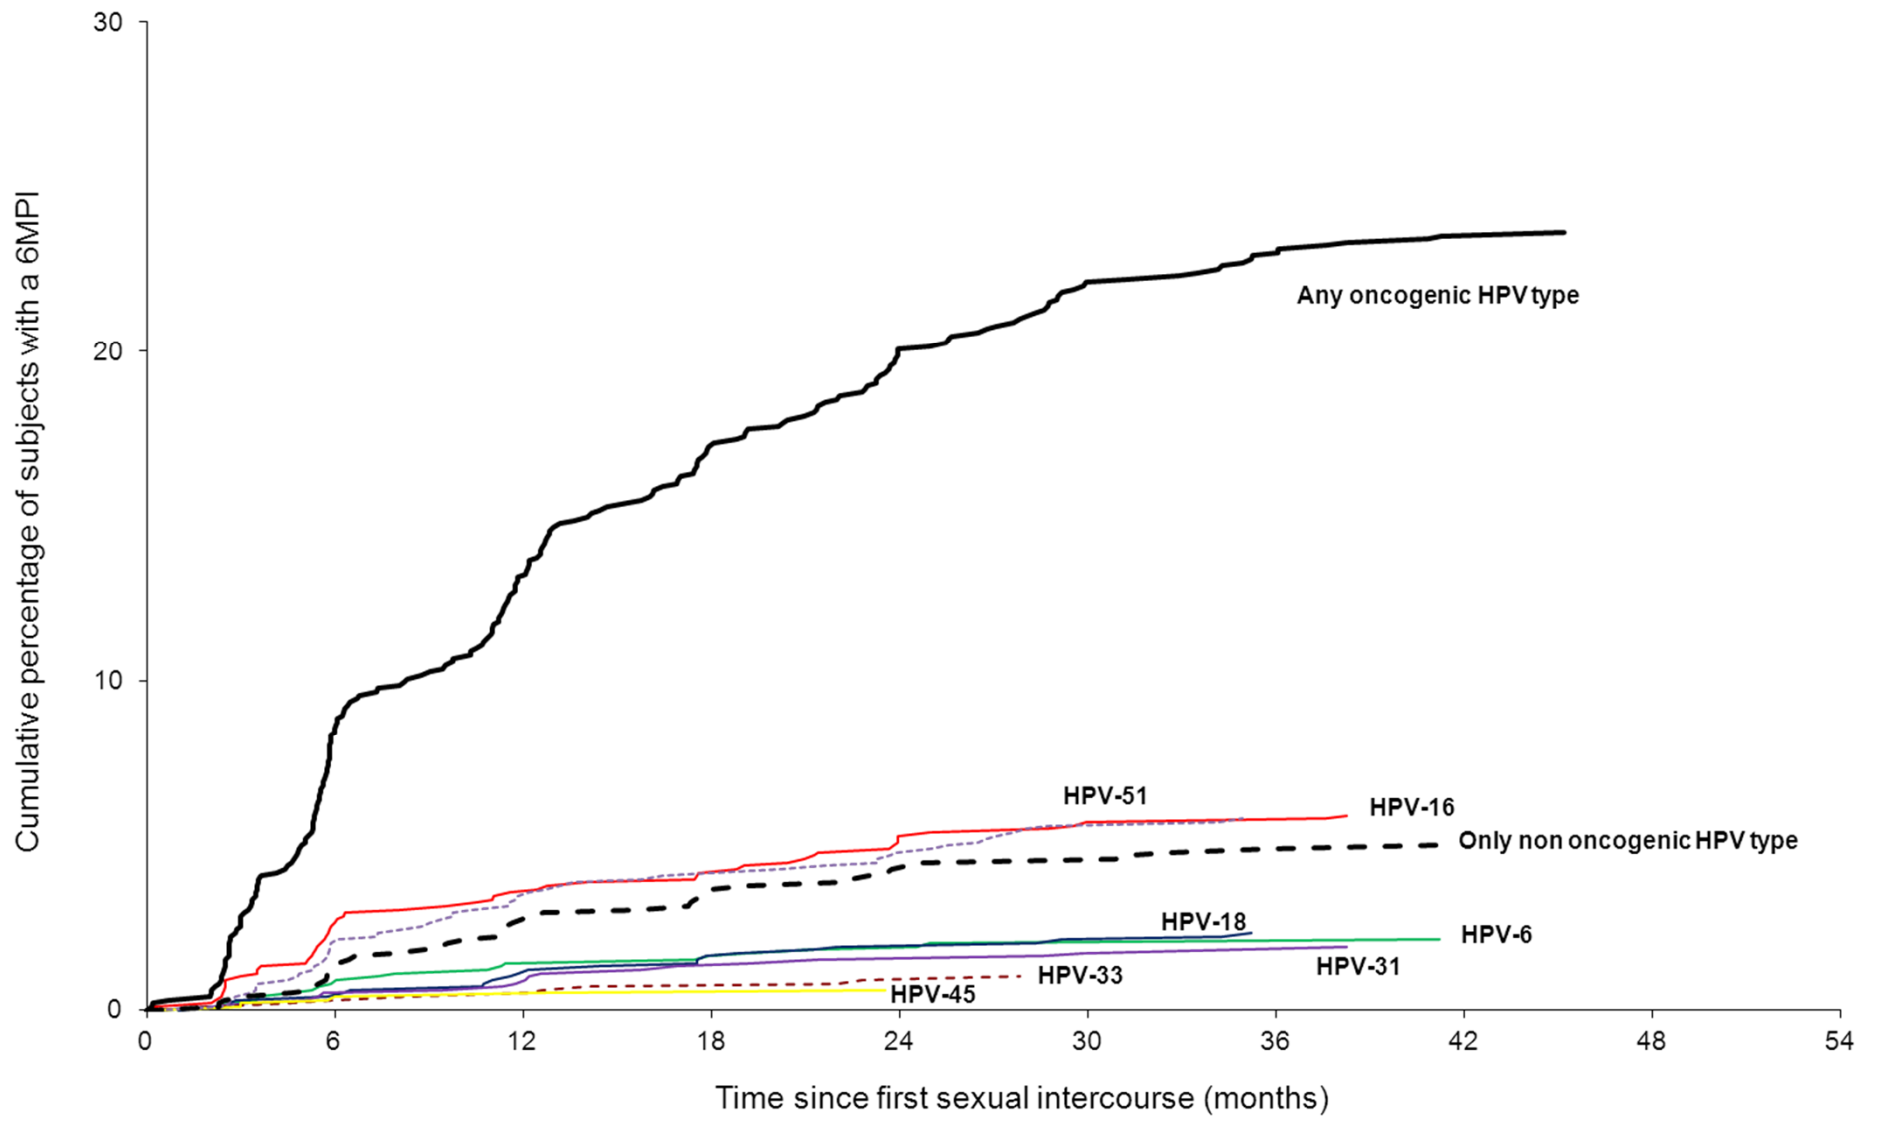

Supplement: 12879_2014_551_MOESM4_ESM.pdf [file 12879_2014_551_MOESM4_ESM.pdf]
